# Supplementary material for: Optimal empiric treatment for KPC-2-producing Klebsiella pneumoniae infections in critically ill patients with normal or decreased renal function using Monte Carlo simulation
Source: Springer Nature journal article supplement (doi:10.1186/s12879-021-06000-2), 2021-03-26
Supplement: MOESM2 [file 19010468]

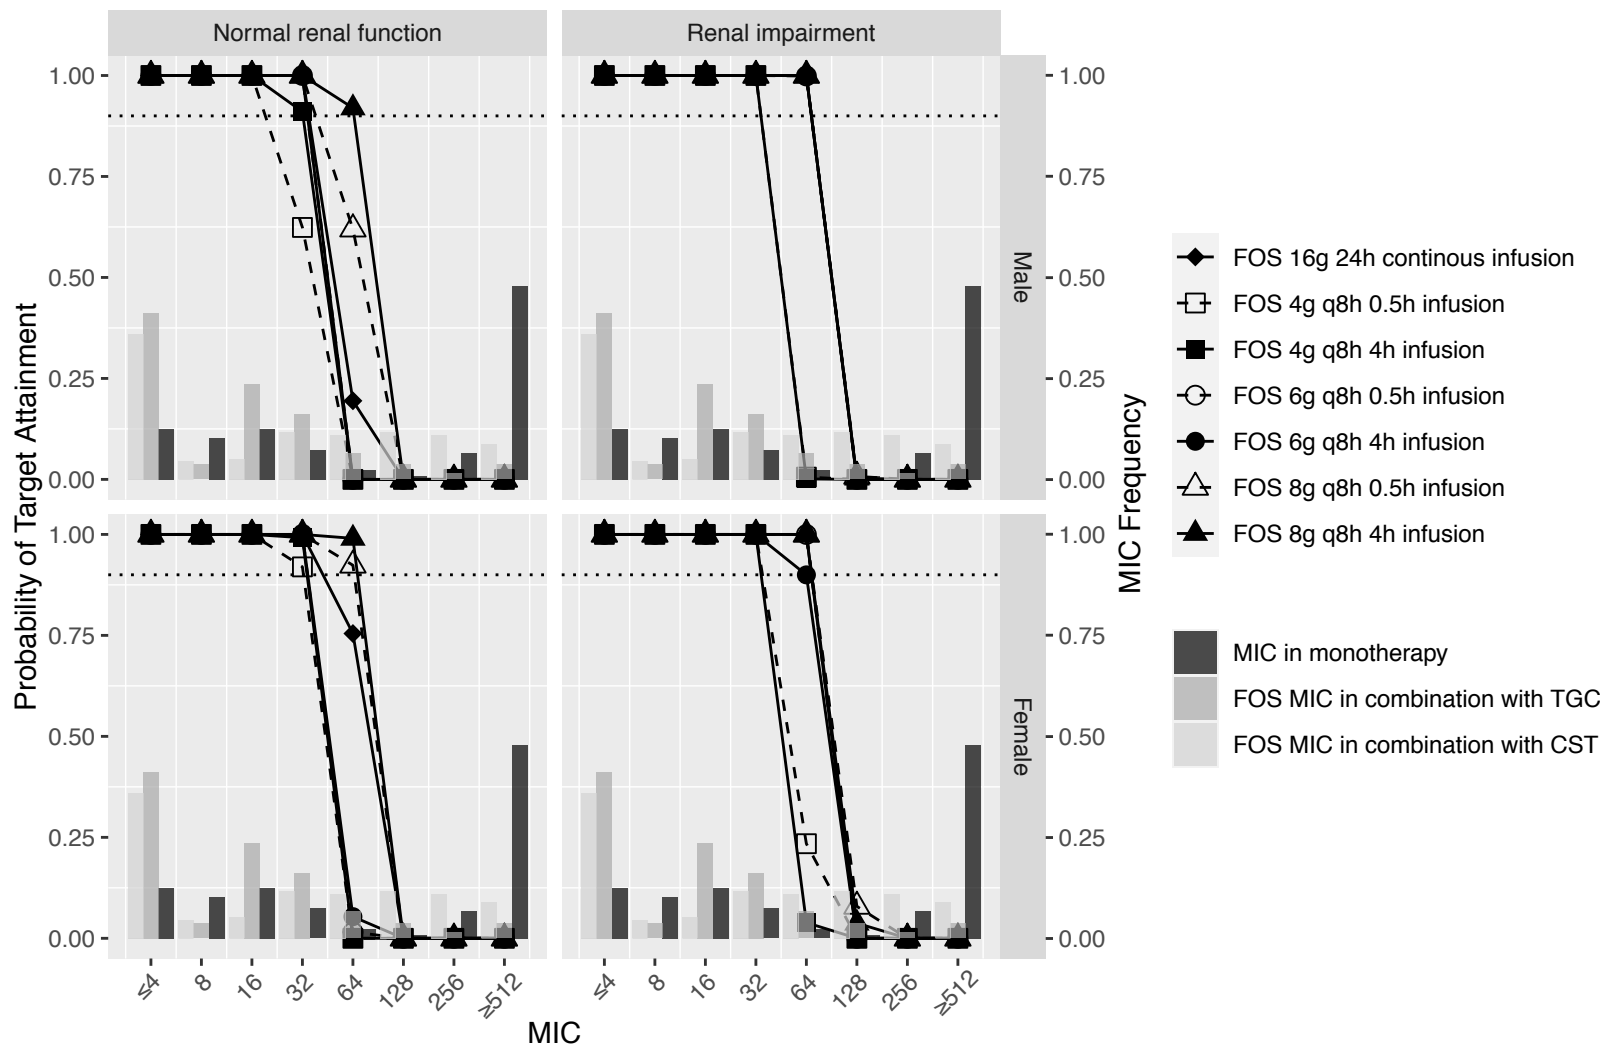

**Figure S2.** The MIC distribution of FOS in monotherapy or combination with TGC or CMS against 136 KPC-producing *Klebsiella pneumoniae*, and probability of target attainment (PTA) of 70%  $fT > MIC$  for FOS dosing regimens in critically ill elderly patients with normal renal function (Left) and renal impairment (right). Open symbols indicate a 0.5-h infusion, and filled symbols indicate a prolonged infusion. The dotted line indicates the PTA of 0.9. FOS, fosfomycin; TGC, tigecycline; CST, colistin.
