# Supplementary material for: Optimal empiric treatment for KPC-2-producing Klebsiella pneumoniae infections in critically ill patients with normal or decreased renal function using Monte Carlo simulation
Source: BMC Infect Dis. 2021 Mar 26;21:307. doi: 10.1186/s12879-021-06000-2 (PMC8004468; doi:10.1186/s12879-021-06000-2)
Supplement: Supplementary file 1 — Additional file 1: Supplementary material associated with this article can be found in Table S1. and Figure S1. [file 12879_2021_6000_MOESM1_ESM.zip]

Archive with 2 entries (2 files):
- Figure S1.pdf
- Supplementary Table.docx
